**TITLE:** EFFECT OF CARBON DIOXIDE (HYPOCAPNIA AND HYPERCAPNIA) ON REGIONAL MYOCARDIAL TISSUE OXYGEN TENSION IN DOGS WITH CORONARY STENOSIS

**AUTHORS:** K. Okazaki, M.D., K. Hashimoto, M.D., Y. Okutsu, M.D., F. Okumura, M.D., and A.F. Fukunaga, M.D., PhD.

**AFFILIATION:** Dept. Anesth., Yokohama Univ. Sch. of Med., Yokohama, Japan, and Dept. Anesth. Harbor/UCLA Med. Cent., Torrance, CA

Carbon dioxide (CO<sub>2</sub>) has been well documented to act as a potent vasodilator of coronary vessels under normal conditions. But there is little data available on the effect of CO<sub>2</sub> on the collateral perfusion of patients with coronary insufficiency. We studied the effects of CO<sub>2</sub> on the myocardial tissue PO<sub>2</sub> with critical coronary stenosis in the anesthetized dogs.

12 mongrel dogs were anesthetized with pentobarbital 30mg/kg and ventilated with 100% O<sub>2</sub> to maintain normocapnia. Following left thoracotomy, electromagnetic blood flow (BF) probe was applied to the left anterior descending artery (LAD). Two different regional PO<sub>2</sub> were measured using two pairs of monopolar polarographic needle electrodes; one inserted in the epicardial (EPI), and the other in the endocardial (ENDO) layer, which were placed in the regions supplied by LAD and circumflex. Following the baseline recording, critical stenosis of LAD was produced by adjusting a copper-wire clamp occluder until LADBF reduced to 50%. After a stable normocapnic ventilation, hypocapnia was produced by hyperventilation which was kept fixed throughout the experiment. To

induce hypercapnia, exogenous CO<sub>2</sub> was added to the inspired gas stepwisely till End-tidal CO<sub>2</sub> fraction (FECO<sub>2</sub>) reached 10%. In each step, the following variables were measured: cardiac output (CO), PaO<sub>2</sub>, PaCO<sub>2</sub>, LADBF, regional PO<sub>2</sub> in both normal(N) and ischemic(I) myocardium(N-EPI PO<sub>2</sub>, N-ENDO PO<sub>2</sub>, and I-EPI PO<sub>2</sub>, I-ENDO PO<sub>2</sub>). The data were analyzed using paired-T test accepting p<0.05 as significant. The results are summarized in table 1. Hypocapnia resulted in a significant reduction of PO<sub>2</sub> in both EPI and ENDO non-stenotic areas, while hypercapnia increased these PO<sub>2</sub> values dose-dependently. After coronary stenosis, hypocapnia resulted in small but significant reduction of PO<sub>2</sub> in endocardial ischemic area. Hypercapnia did not show any sign of reduced regional myocardial tissue PO<sub>2</sub> or evidence of regional or intramural "steal" phenomenon. Thus, we conclude that hypercapnia may not worsen the oxygenation of the ischemic myocardium and that maintenance of PaCO<sub>2</sub> and avoidance of hypocapnic hyperventilation are important for myocardial oxygenation in both normal and ischemic heart.

| Table 1.                      | Normo-ventilation | Hyperventilation | CO <sub>2</sub> inhalation |
|-------------------------------|-------------------|------------------|----------------------------|
| FECO <sub>2</sub> (%)         | 5                 | 2                | 6                          |
| HR (b.p.m.)                   | 155±4*            | 182±5            | 146±4*                     |
| MAP(mmHg)                     | 128±7             | 126±5            | 125±5                      |
| C.O. (l/min.)                 | 1.73±0.10         | 1.67±0.06        | 1.76±0.09                  |
| PaCO <sub>2</sub> (mmHg)      | 38±1*             | 23±1             | 47±2*                      |
| PaO <sub>2</sub> (mmHg)       | 434±37            | 487±17           | 453±23                     |
| normal                        |                   |                  |                            |
| LADBF(ml/min.)                | 21±4*             | 17±3             | 28±4*                      |
| N-EPI PO <sub>2</sub> (mmHg)  | 37±2*             | 33±2             | 42±2*                      |
| N-ENDO PO <sub>2</sub> (mmHg) | 51±5*             | 37±2             | 63±5*                      |
| post-stenosis                 |                   |                  |                            |
| LADBF(ml/min.)                | 11±2              | 11±1             | 12±1                       |
| I-EPI PO <sub>2</sub> (mmHg)  | 20±2              | 18±2             | 20±3                       |
| I-ENDO PO <sub>2</sub> (mmHg) | 31±3*             | 25±3             | 36±4*                      |

Mean±SEM p<0.05 from 2% FECO<sub>2</sub>

**TITLE:** MYOCARDIAL O<sub>2</sub> SUPPLY/DEMAND RELATIONS DURING PHENYLEPHRINE-INDUCED PRESSOR RESPONSES

**AUTHORS:** GJ Crystal, PhD, MA Mahdi, MD, MR Salem, MD, SJ Kim, MS

**AFFILIATION:** Depts of Anes, IL Masonic Med Ctr and Univ IL Coll Med, Chicago, IL 60657

Phenylephrine is a vasoconstrictor acting via alpha-adrenergic receptors that is used in anesthesia practice to treat hypotension. Although alpha-adrenergic receptors are present in the coronary circulation (1), it is uncertain whether the plasma concentration of phenylephrine required for pressor responses under general anesthesia is sufficient to cause their activation. If so, this may impair ability of metabolic vasodilator mechanisms to satisfy the pressure-induced augmentation in myocardial oxygen demand. The present study was performed to evaluate changes myocardial blood flow (MBF), oxygen consumption (MVO<sub>2</sub>), and lactate extraction (LAC ext) during intravenous pressor infusions of phenylephrine in anesthetized dogs.

Seven mongrel dogs anesthetized with pentobarbital and fentanyl underwent left thoracotomy and were mechanically ventilated. Measurements were obtained of mean aortic pressure (MAP), heart rate (HR), left ventricular dP/dt max, and aortic blood flow (AOF). Radioactive microspheres (15 u) were used to measure mean left ventricular MBF and its transmural distribution (ENDO/EPI). Samples of blood were obtained from aorta and coronary sinus and analyzed for O<sub>2</sub> content (CO-oximeter) and LAC. MVO<sub>2</sub> was computed with Fick equation. Hemodynamic

measurements were obtained under control conditions and following attainment of steady-state hemodynamic conditions during intravenous infusion of phenylephrine (2.8 ug/min/100g). Statistical analyses were performed with Student's t test for paired samples.

Phenylephrine increased MAP (+48%), decreased HR (-23%) and AOF (-23%), and had no effect on dP/dt max. It caused transmurally-uniform increase in MBF that was in proportion to increase in MVO<sub>2</sub> resulting in no change in A-V O<sub>2</sub> diff., coronary sinus PO<sub>2</sub>, or LAC ext (Table 1).

In conclusion, increases in myocardial MBF were sufficient to satisfy the augmented cardiac work requirement during phenylephrine-induced hypertension. This suggests that vasoconstrictor action of phenylephrine in coronary circulation did not impair ability of metabolic vasodilator mechanisms to maintain myocardial oxygen supply/demand balance.

#### References

1. Marcus, ML. The Coronary Circulation in Health and Disease. MacGraw-Hill, 1983, pp 130-132

Table 1. Myocardial effects of phenylephrine.

|                                | Control    | Phenylephrine |
|--------------------------------|------------|---------------|
| MBF, ml/min/100g               | 57 ± 8     | 101 ± 14*     |
| ENDO/EPI                       | 1.1 ± 0.1  | 1.1 ± 0.1     |
| MVO <sub>2</sub> , ml/min/100g | 7.8 ± 0.9  | 15.1 ± 2.7*   |
| A-V O <sub>2</sub> , vol. %    | 14.1 ± 0.3 | 14.3 ± 0.9    |
| CS PO <sub>2</sub> , mmHg      | 28 ± 2     | 28 ± 1        |
| LAC ext., %                    | 51 ± 9     | 57 ± 4        |

Values are Mean ± S.E. \*P<0.05, from Control.
